# Supplementary material for: Barley landraces are characterized by geographically heterogeneous genomic origins
Source: PubMed Central journal article supplement (PMC4546095; doi:10.1186/s13059-015-0712-3), 2015-08-21
Supplement: 13059_2015_712_MOESM6_ESM.pdf [file 13059_2015_712_MOESM6_ESM.pdf]

**A****Central European**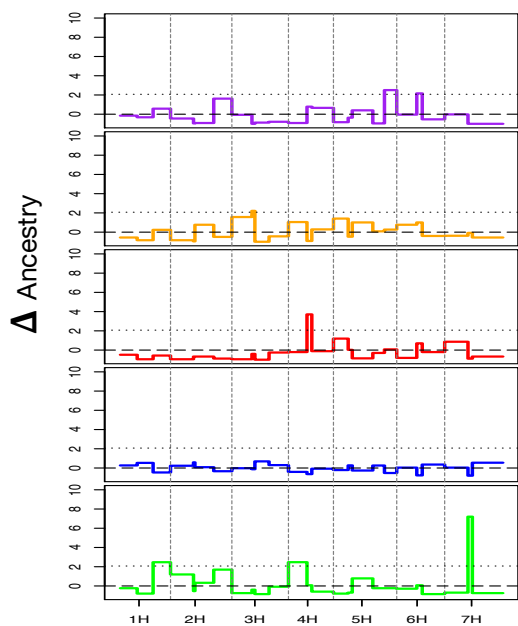

Linkage group

**B****Asian**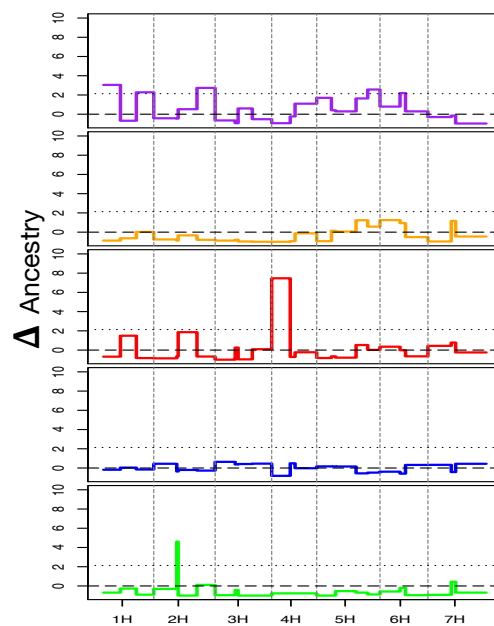

Linkage group

**Wild Populations**

- Central Asia
- Northern Levant
- Northern Mesopotamia
- Southern Levant
- Syrian Desert
- - Genome-wide average ancestry
- . . 98th percentile cutoff

**C****Coastal Mediterranean**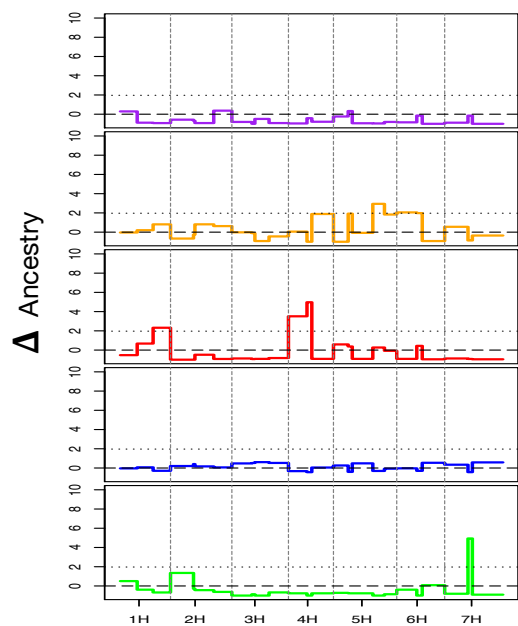

Linkage group

**D****East African**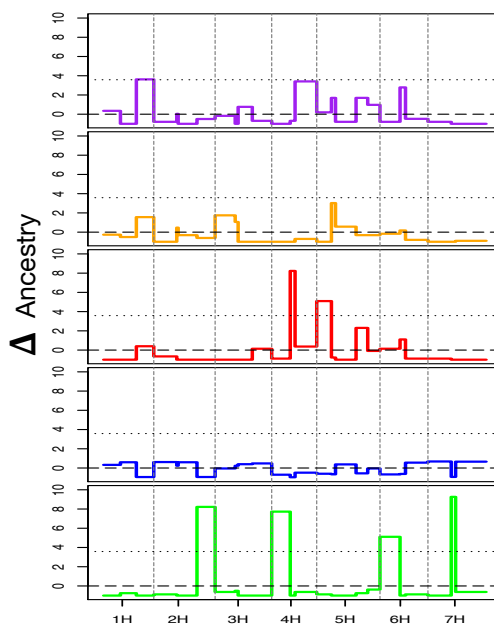

Linkage group
