# Supplementary material for: Barley landraces are characterized by geographically heterogeneous genomic origins
Source: PubMed Central journal article supplement (PMC4546095; doi:10.1186/s13059-015-0712-3), 2015-08-21
Supplement: 13059_2015_712_MOESM14_ESM.pdf [file 13059_2015_712_MOESM14_ESM.pdf]

### Northern Levant wild ancestry

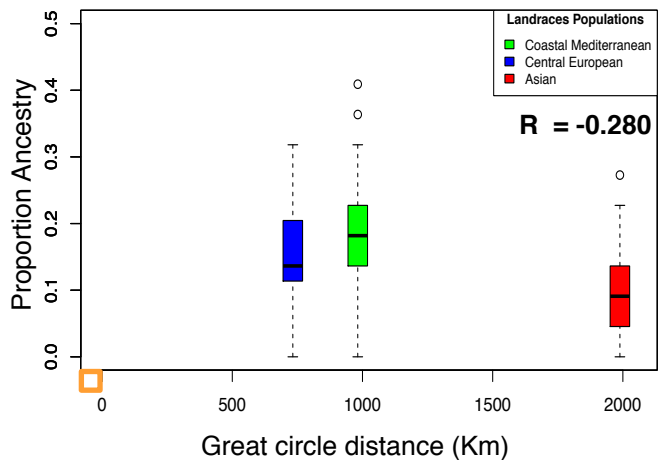

### Central Asia wild ancestry

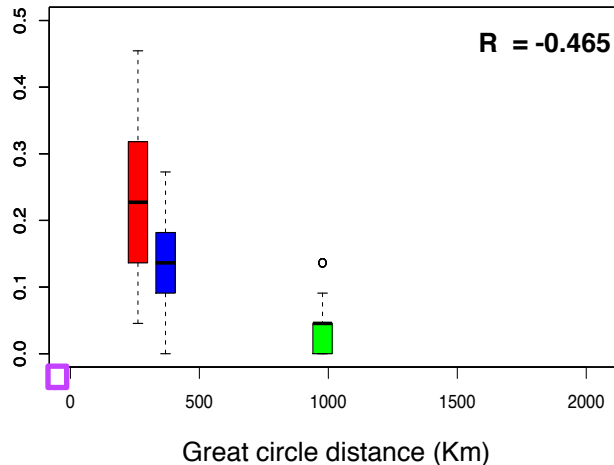

### Northern Mesopotamia wild ancestry

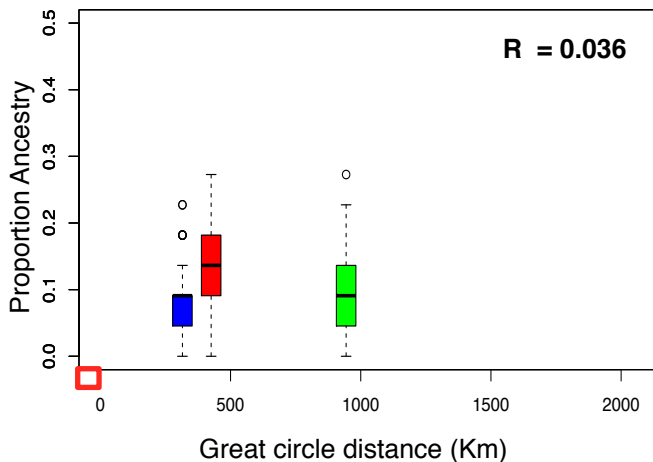

### Syrian Desert wild ancestry

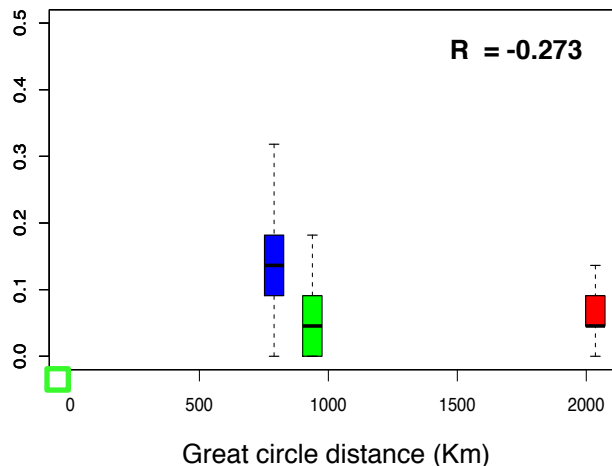

### Southern Levant wild ancestry

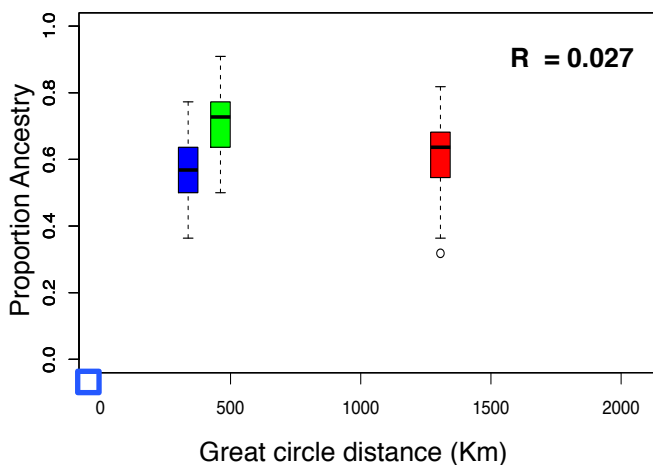

### Barley Geographic Distribution

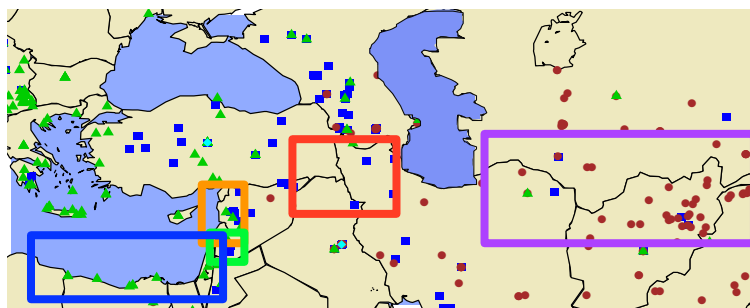

#### Barley landraces

- Central European
- Asian
- ▲ Coastal Mediterranean
- ◆ East Africa

#### Wild barley populations

- Syrian Desert
- Northern Mesopotamia
- Northern Levant
- Southern Levant
- Central Asia
