# Supplementary material for: Barley landraces are characterized by geographically heterogeneous genomic origins
Source: PubMed Central journal article supplement (PMC4546095; doi:10.1186/s13059-015-0712-3), 2015-08-21

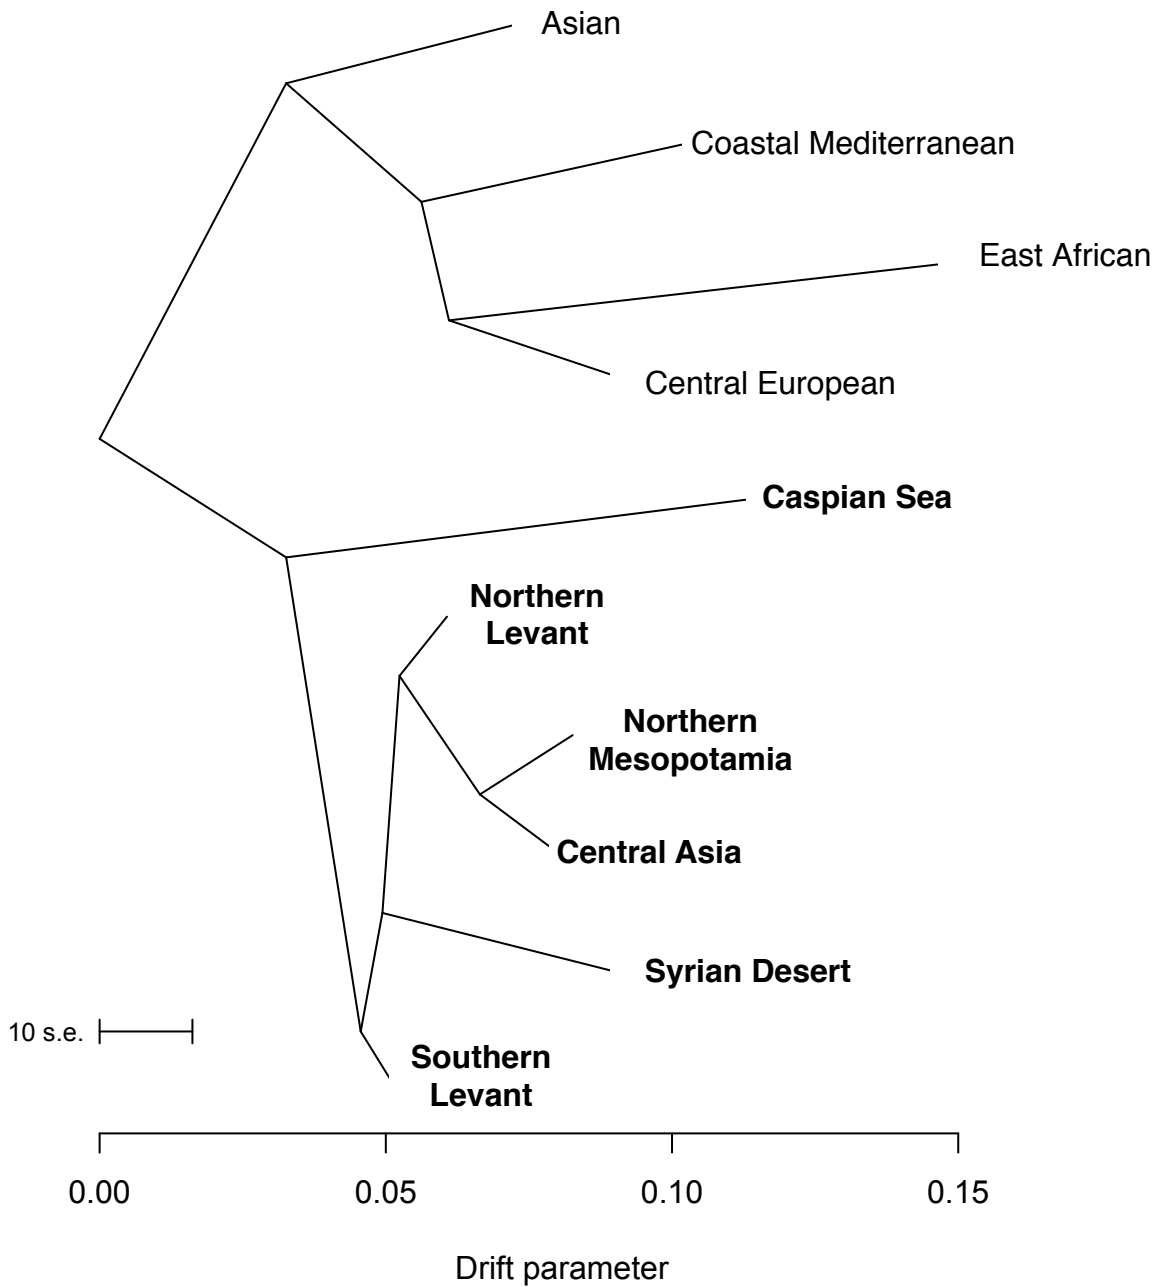

Supplement: 13059_2015_712_MOESM23_ESM.pdf [file 13059_2015_712_MOESM23_ESM.pdf]
